# Supplementary material for: Copolymerization of Ethylene and Methyl Acrylate by Dibenzocycloheptyl-Substituted Aryliminopyridyl Ni(II) Catalysts
Source: MDPI journal article supplement (doi:10.3390/macromol2040031), 2022-10-23
Supplement: s1 [file s1]

# Copolymerization of Ethylene and Methyl Acrylate by Dibenzocycloheptyl-Substituted Aryliminopyridyl Ni(II) Catalysts

Ilaria D'Auria <sup>1</sup>, Zeinab Saki <sup>1</sup>, Ming Liu <sup>2</sup>, Wen-Hua Sun <sup>2</sup> and Claudio Pellecchia <sup>1,\*</sup>

<sup>1</sup> Dipartimento di Chimica e Biologia "A. Zambelli", Università di Salerno, via Giovanni Paolo II 132, 84084 Fisciano (SA), Italy

<sup>2</sup> Key Laboratory of Engineering Plastics, Beijing National Laboratory for Molecular Sciences, Institute of Chemistry, Chinese Academy of Sciences, Beijing 100190, China

\* Correspondence: cpellecchia@unisa.it

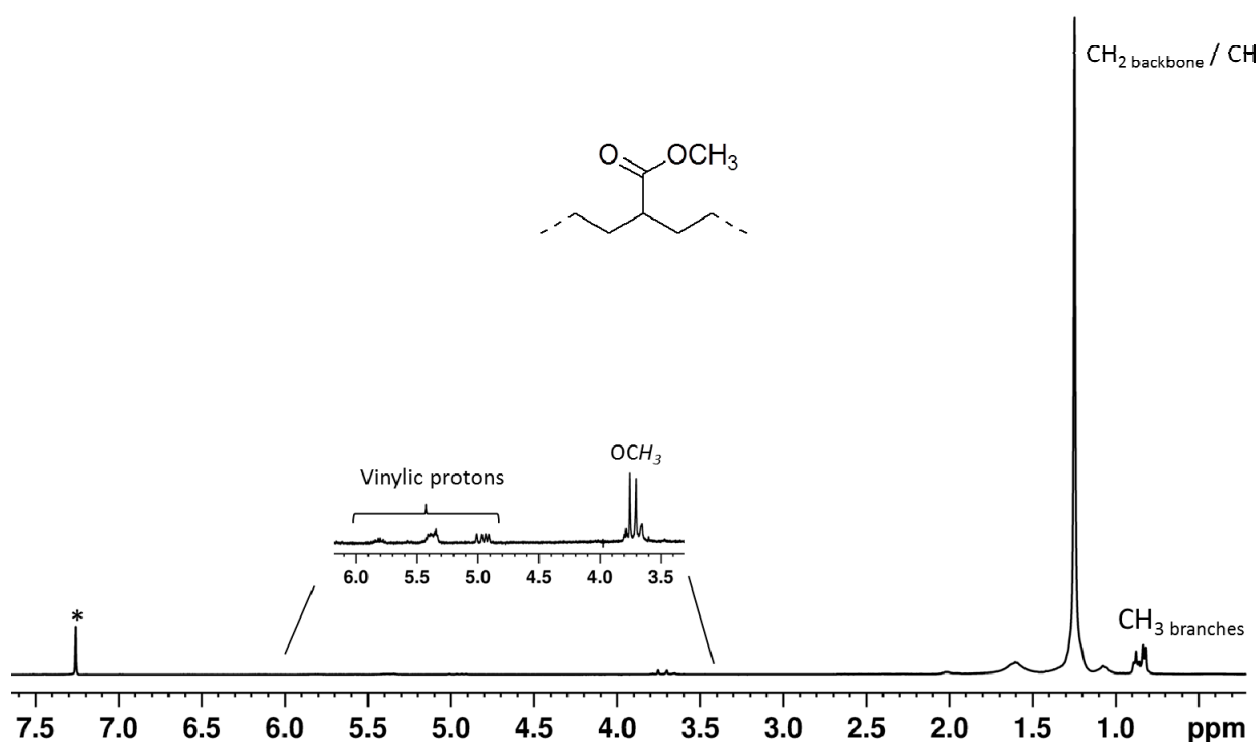

**Figure S1.** <sup>1</sup>H NMR (C<sub>2</sub>D<sub>2</sub>Cl<sub>4</sub>, 600 MHz, T = 298 K) spectrum of the copolymer sample of run 1, Table 1 (\* stands for residual solvent).

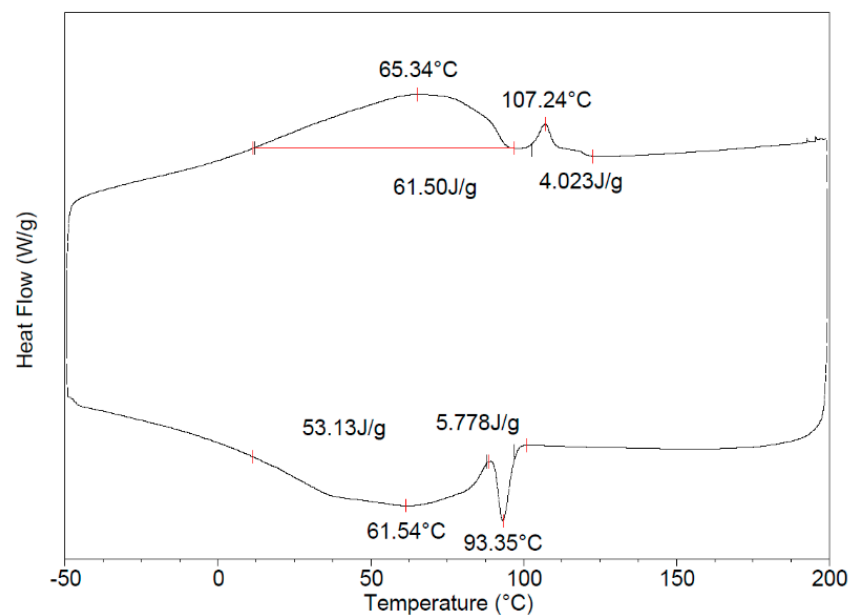

**Figure S2.** DSC thermogram of copolymer obtained in run 2, Table 1.

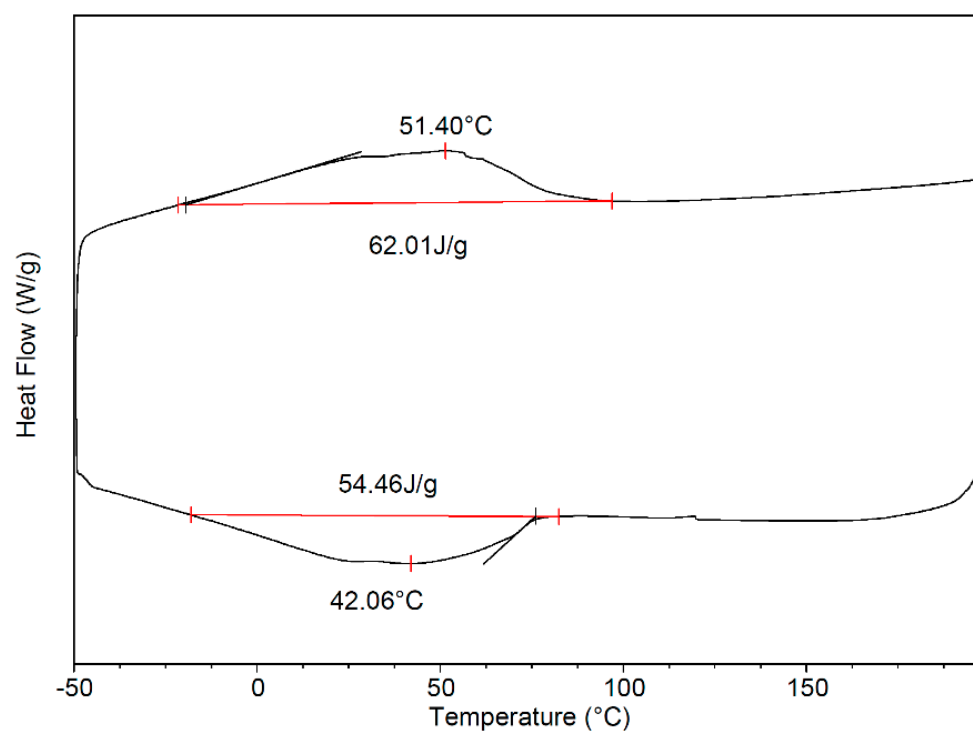

**Figure S3.** DSC thermogram of copolymer obtained in run 3, Table 1.

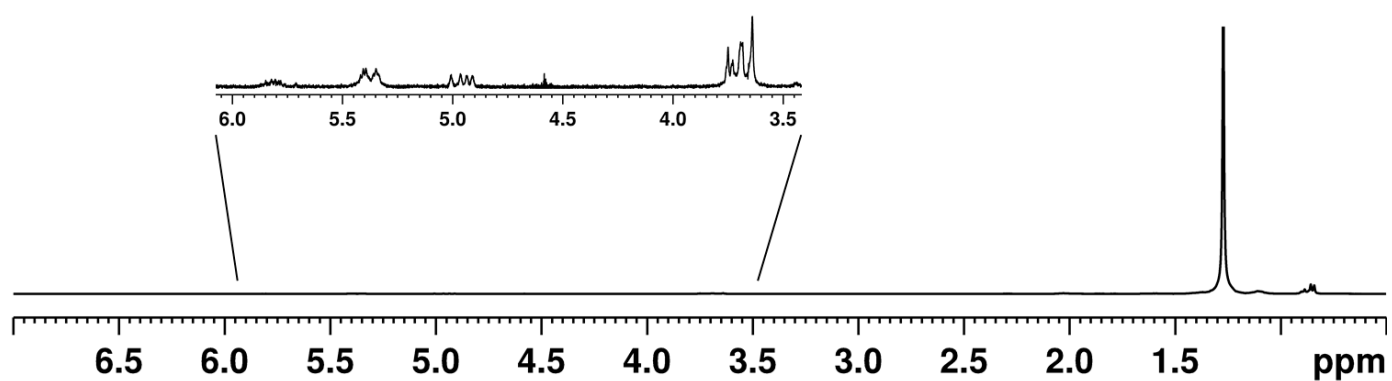

**Figure S4.**  $^1\text{H}$  NMR ( $\text{CDCl}_3$ , 400 MHz,  $T = 298\text{ K}$ ) spectrum of the copolymer sample of run 8, Table 2.
